# Supplementary material
Source: publisher figshare collection journal article supplement (https://acs.figshare.com/ndownloader/files/3895432)
Supplement: Supplementary file 1 [file 3895432]

# Perturbation of the Charge Density between two Bridged Mo<sub>2</sub> Centers: the Remote Substituent Effects

Tao Cheng, Miao Meng, Hao Lei and Chun Y. Liu\*

Department of Chemistry, Jinan University, 601 Huang-Pu Avenue West,  
Guangzhou 510632, China.

E-mail: [tcylu@jnu.edu.cn](mailto:tcylu@jnu.edu.cn) (C. Y. Liu)

## Supporting Information Contents

<sup>1</sup>H NMR spectra

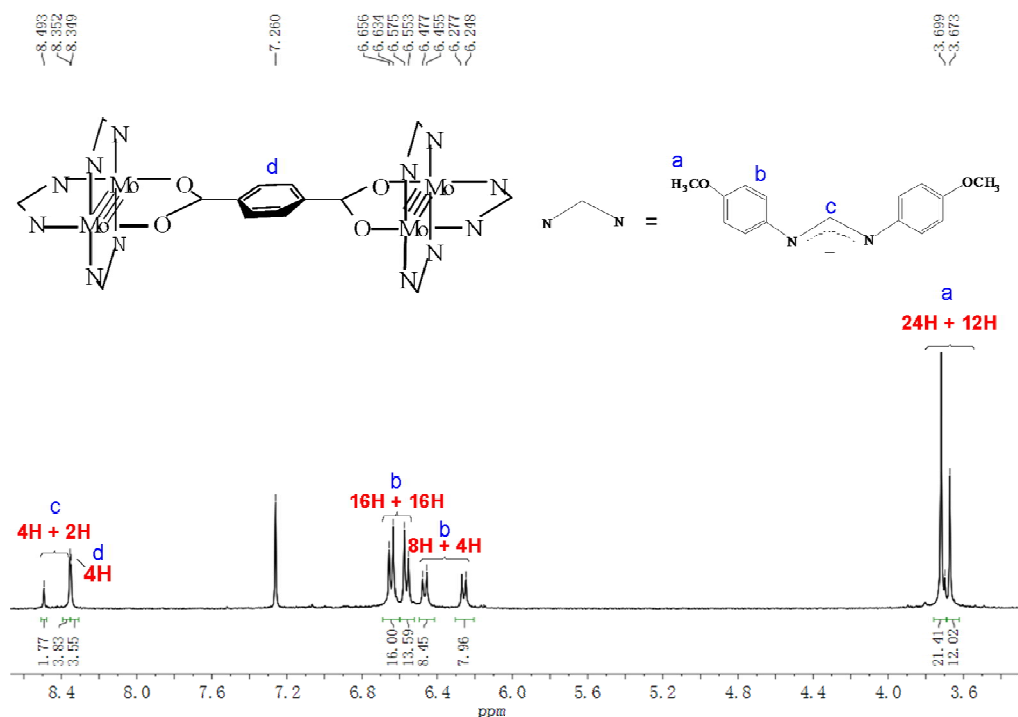

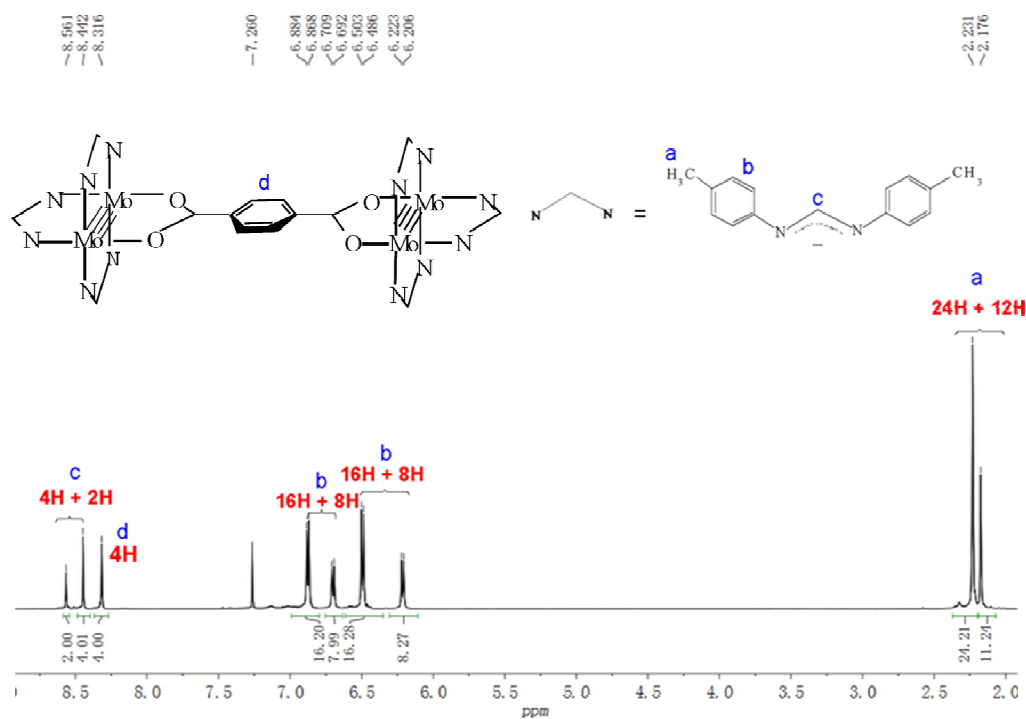

**Figure S2.** <sup>1</sup>H NMR spectrum for **2**.

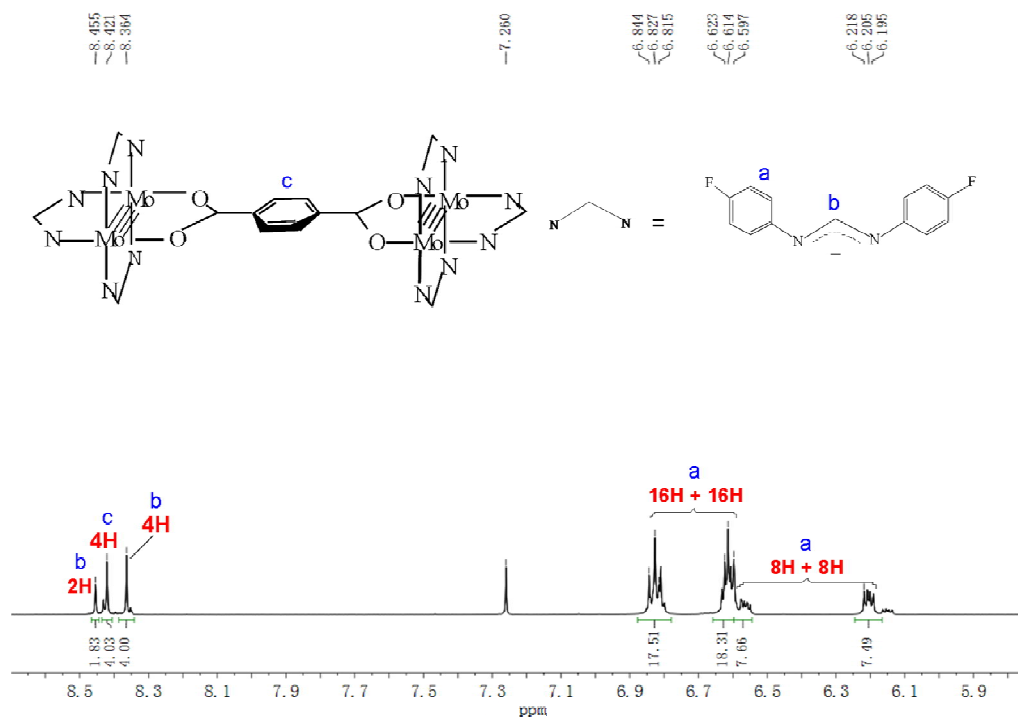

**Figure S3.** <sup>1</sup>H NMR spectrum for **3**.

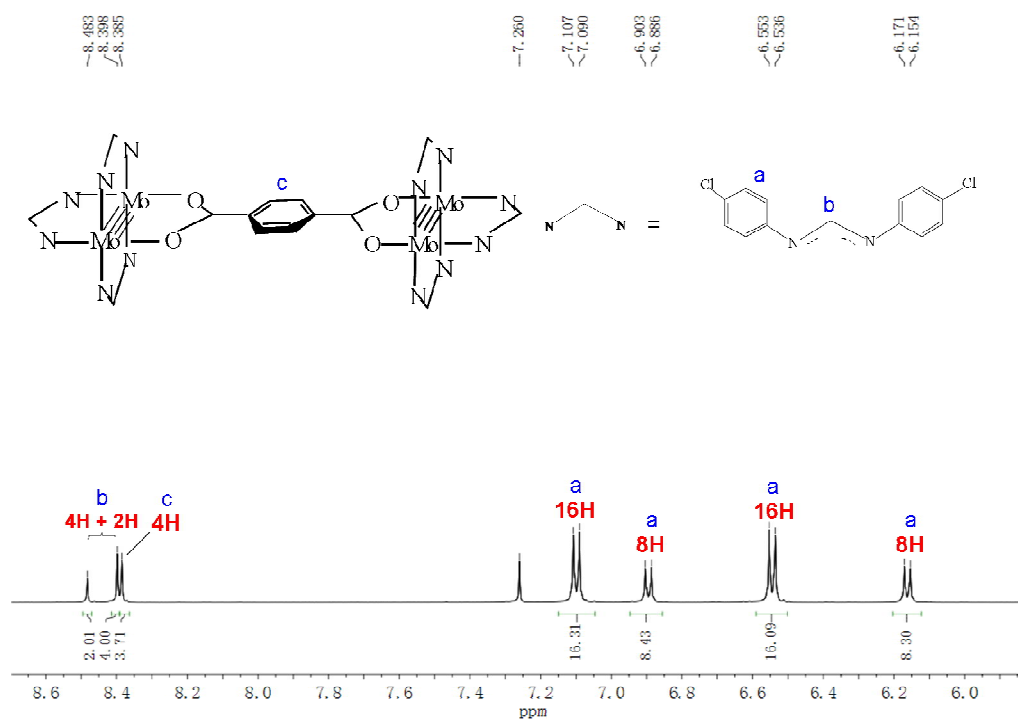

**Figure S4.** <sup>1</sup>H NMR spectrum for **4**.

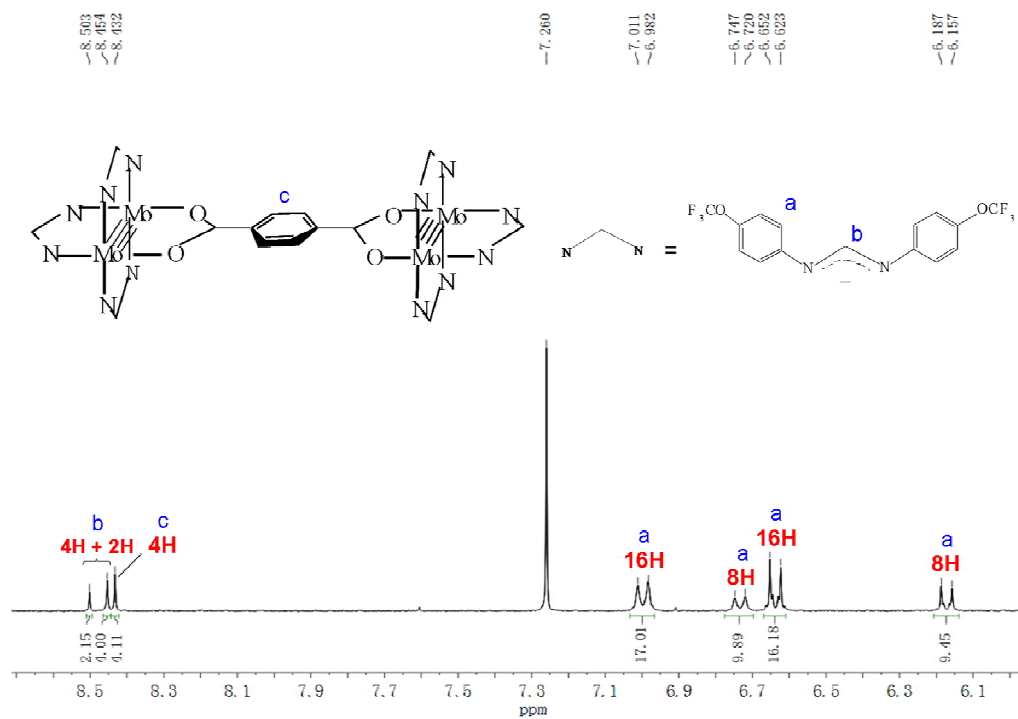

**Figure S5.** <sup>1</sup>H NMR spectrum for **5**.

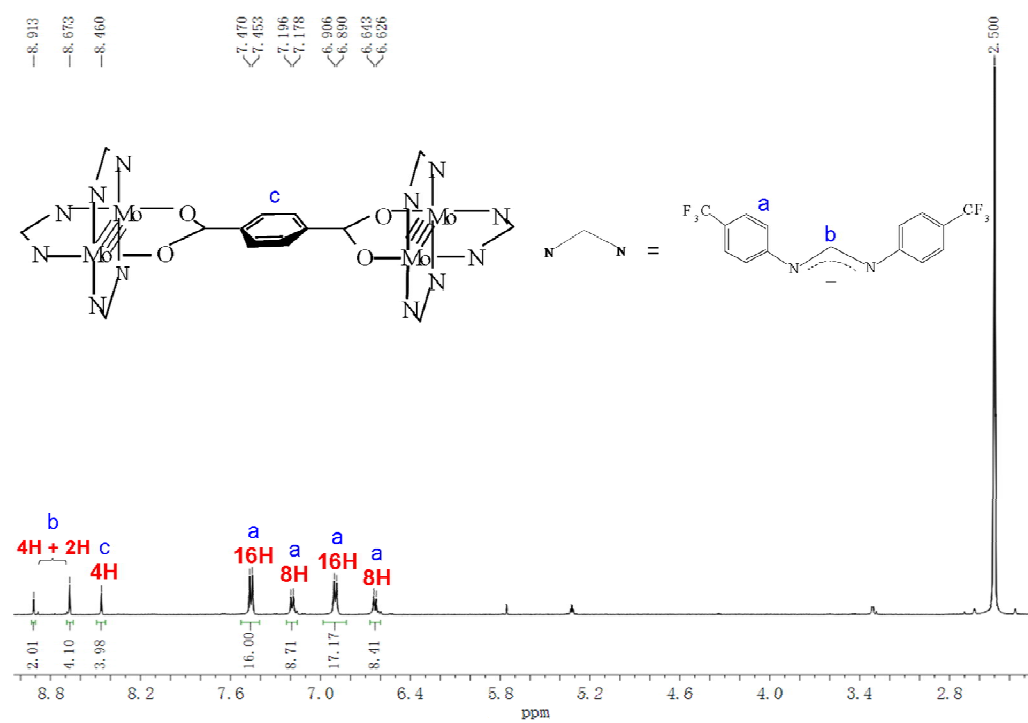

**Figure S6.**  $^1\text{H}$  NMR spectrum for **6**.

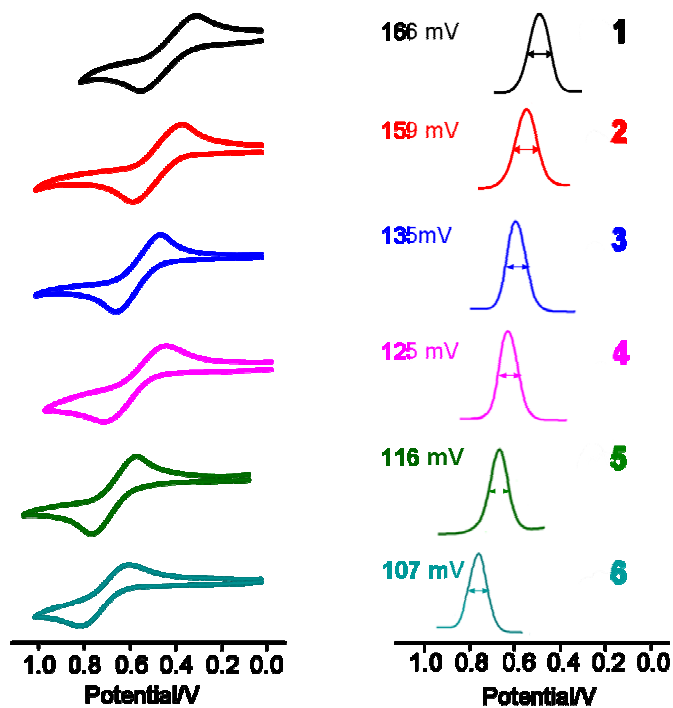

**Figure S7.** Electrochemical cyclic voltammograms (CVs, left) and differential pulse voltammograms (DPVs, right) for complexes **1-6** as labeled in different colors. The half-height widths ( $i_{\max}/2$ ) are measured from the DPV plots.

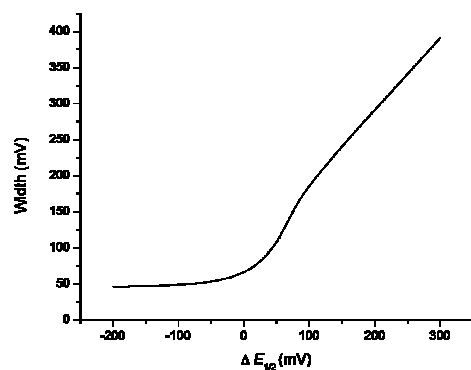

**Figure S8.** Working curve, generated from the data in ref 22 (Richardson, D. E.; Taube, H. *Inorg. Chem.* **1981**, 20, 1278–1285), for electrochemical data analyses.

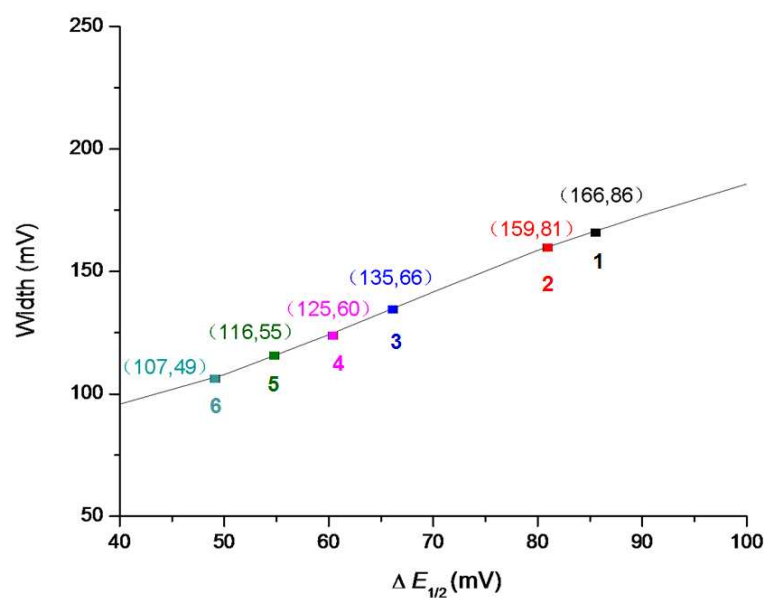

**Figure S9.**  $\Delta E_{1/2}$  data derived for complexes **1-6** from the working curve (**Figure S8**).

**Table S1.** The values of width and  $\Delta E_{1/2}$  for complexes **1-6**.

| parameter             | <b>1</b> (OCH <sub>3</sub> ) | <b>2</b> (CH <sub>3</sub> ) | <b>3</b> (F) | <b>4</b> (Cl) | <b>5</b> (OCF <sub>3</sub> ) | <b>6</b> (CF <sub>3</sub> ) |
|-----------------------|------------------------------|-----------------------------|--------------|---------------|------------------------------|-----------------------------|
| Width (mV)            | 166                          | 159                         | 135          | 125           | 116                          | 107                         |
| $\Delta E_{1/2}$ (mV) | 86                           | 81                          | 66           | 60            | 55                           | 49                          |

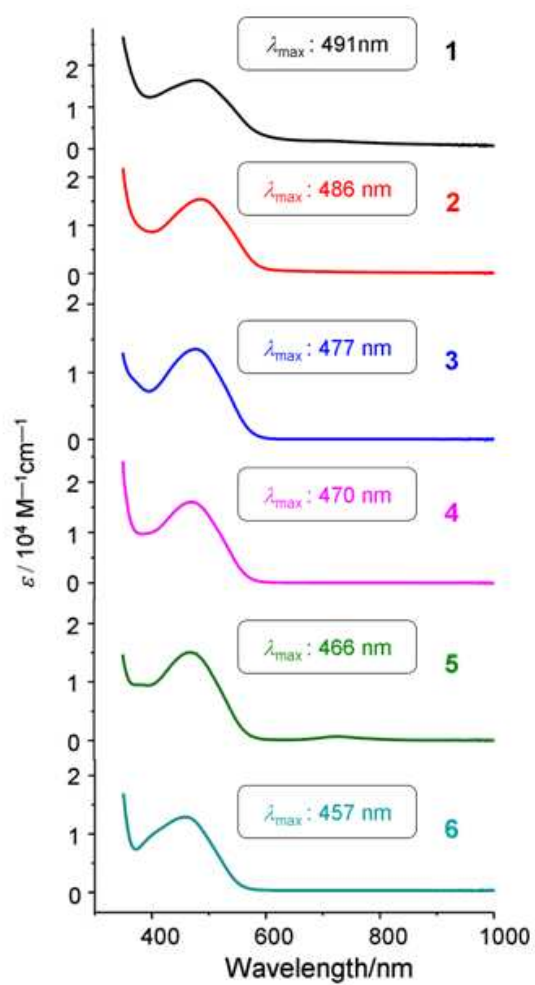

**Figure S10.** Electronic spectra showing the metal to ligand charge transfer (MLCT) absorption bands for complexes **1-6**.
